# Supplementary material for: Enhancing the Electrochemical Performance of ZnO-Co3O4 and Zn-Co-O Supercapacitor Electrodes Due to the In Situ Electrochemical Etching Process and the Formation of Co3O4 Nanoparticles
Source: MDPI journal article supplement (doi:10.3390/en17081888), 2024-04-16
Supplement: s1 [file s1]

Archive with 1 entries (1 files):
- energies-2947757-supplementary.pdf
